# Supplementary material for: Pharmacophore Modeling and Molecular Docking Studies on Pinus roxburghii as a Target for Diabetes Mellitus
Source: PubMed Central journal article supplement (PMC4120483; doi:10.1155/2014/903246), 2014-07-10
Supplement: 903246.f1.pdf [file 903246.f1.pdf]

Table 1 List of chemical constituents reported in *Pinus roxburghii*

| S.No | Chemical constituent       | CHEMSPIDER ID | LOG P  | H BOND Acceptor | H BOND donor | Mol wt  | No of violation | TPSA    |
|------|----------------------------|---------------|--------|-----------------|--------------|---------|-----------------|---------|
|      | <b>Resin acid</b>          |               |        |                 |              |         |                 |         |
| 1.   | Pimaric acid               | 16735968      | 4.957  | 2               | 1            | 302.458 | 0               | 37.299  |
| 2.   | Abietic acid               | 10127         | 5.007  | 2               | 1            | 302.458 | 1               | 37.299  |
| 3.   | Sandracopimaric acid       | 192262        | 4.957  | 2               | 1            | 302.458 | 0               | 37.299  |
| 4.   | Dehydroabietic acid        | 85184         | 5.67   | 2               | 1            | 300.442 | 1               | 37.299  |
| 5.   | Neoabietic acid            | 191824        | 5.312  | 2               | 1            | 302.458 | 1               | 37.299  |
|      | <b>Sterols</b>             |               |        |                 |              |         |                 |         |
| 6.   | Campesterol                | 151215        | 8.305  | 1               | 1            | 400.691 | 1               | 20.228  |
| 7.   | Sitosterol                 | 192962        | 8.62   | 1               | 1            | 414.718 | 1               | 20.228  |
| 8.   | Stigmasterol               | 4444352       | 7.869  | 1               | 1            | 412.702 | 1               | 20.228  |
|      | <b>Simple acid</b>         |               |        |                 |              |         |                 |         |
| 9.   | 3,4 dihydroxybenzoic acid  | 71            | 0.88   | 4               | 3            | 154.121 | 0               | 77.755  |
| 10.  | 3,4 dihydroxycinnamic acid | 1266077       | 0.941  | 4               | 3            | 180.159 | 0               |         |
|      | <b>Ferulates</b>           |               |        |                 |              |         |                 |         |
| 11.  | Hexacosyferulate           | -----         | 10.107 | 3               | 1            | 558.932 | 2               | 46.533  |
|      | <b>Lignans</b>             |               |        |                 |              |         |                 |         |
| 12.  | Pinoresinol                | 204822        | 2.587  | 6               | 2            | 358.39  | 0               | 77.392  |
| 13.  | secoisoresinol             | 58845         | 2.075  | 6               | 4            | 362.422 | 0               | 99.38   |
|      | <b>Stilbens</b>            |               |        |                 |              |         |                 |         |
| 14.  | Pinosylvin                 | 11286912      | 3.437  | 2               | 2            | 226.275 | 0               | 40.456  |
|      | <b>Flavonoids</b>          |               |        |                 |              |         |                 |         |
| 15.  | Catechin                   | 8711          | 1.369  | 6               | 5            | 290.271 | 0               | 110.374 |
| 16.  | Taxifolin                  | 621332        | 0.712  | 7               | 5            | 304.251 | 0               | 127.445 |
| 17.  | Quercetin                  | 4444051       | 1.683  | 7               | 5            | 302.238 | 0               | 131.351 |
| 18.  | Rutin                      | 4444362       | -1.063 | 16              | 10           | 610.521 | 3               | 269.427 |
| 19.  | Cedeodarin                 | 158323        | 1.349  | 7               | 5            | 318.281 | 0               | 127.445 |
| 20.  | Kaempferol                 | 4444395       | 2.172  | 6               | 4            | 286.239 | 0               | 111.123 |
| 21.  | Rhamnetin                  | 4445008       | 2.219  | 7               | 4            | 316.265 | 0               | 120.357 |
| 22.  | Isorhamnetin               | 4444973       | 1.99   | 7               | 4            | 316.265 | 0               | 120.357 |
| 23.  | Xanthone                   | 6753          | 3.57   | 2               | 0            | 196.205 | 0               | 30.211  |
|      | <b>Triterpenoid</b>        |               |        |                 |              |         |                 |         |
| 24.  | Friedelin                  | 82597         | 7.854  | 1               | 0            | 426.729 | 1               | 17.071  |
|      | <b>Fatty alcohol</b>       |               |        |                 |              |         |                 |         |
| 25.  | Ceryl alcohol              | 61478         | 9.655  | 1               | 1            | 382.717 | 1               | 20.228  |

Table 2 Docking scores of Chemical constituents from *Pinus roxburghii* using PDB ID: 1IR3

| S.no | Compound                  | MolDock Score | Amino acid residue                                                           | Atom of the ligand                                                                                                  | H-boond length (Å <sup>0</sup> )                 |
|------|---------------------------|---------------|------------------------------------------------------------------------------|---------------------------------------------------------------------------------------------------------------------|--------------------------------------------------|
| 1.   | ANP                       | -268.525      | Ser 1006<br>Lys 1030<br><br>Asp 1083<br>Ser 1006<br>Met 1079<br><br>Glu 1077 | O of SO <sub>2</sub><br>3-OH of furan<br>N of NH <sub>2</sub><br>O of SO <sub>2</sub><br>O of Pyranose<br>O of 4-OH | 2.80<br>2.79<br><br>2.02<br>3.40<br>3.10<br>3.07 |
| 2.   | 3,4 dihydroxybenzoic acid | -82.7528      | Ser 1006<br>Ser1006<br>Gln 1004                                              | O of CO <sub>2</sub><br>O of CO <sub>2</sub><br>O of ligand                                                         | 2.82<br>3.12<br>2.99                             |
| 3.   | Catechin                  | -90.1103      | Met 1079<br>Met 1079<br>Asp 1083<br>Lys 1030                                 | O of 4-OH<br>O of 4-OH<br>O of 4-OH<br>O of OH                                                                      | 3.14<br>3.32<br>2.99<br>3.23                     |
| 4.   | Secoisoresinol            | -123.346      | Glu 1077<br>Met 1079<br>Asp1083<br>Lys 1030                                  | O of 4-OH<br>O of 4-OH<br>O of -OH<br>O of 4-OH                                                                     | 3.29<br>3.04<br>2.97<br>3.12                     |
| 5.   | Sandracopimaric acid      | -104.622      | Lys 1030                                                                     | O of -CO                                                                                                            | 3.03                                             |
| 6.   | Pinoresinol               | -122.854      | Met 1079<br>Met 1079                                                         | O of 4-OH<br>O of 4-OH                                                                                              | 3.12<br>2.91                                     |
| 7.   | Taxifoiln                 | -96.0355      | Leu 1002<br>Asp 1083<br>Asp 1083<br>Lys 1030<br>Lys 1030                     | O of 4-OH<br>O of 3-OH<br>O of 3-OH<br>O of -OH<br>O of 4-OH                                                        | 3.12<br>2.37<br>2.64<br>3.10<br>2.50             |
| 8.   | Caffeic acid              | -98.7362      | Lys 1030<br>Lys 1030                                                         | O of 3-OH<br>O of 4-OH                                                                                              | 2.60<br>2.75                                     |
| 9.   | Quercitin                 | -95.4304      | Leu 1002<br>Gln 1004<br>Met 1079<br>Met 1079<br>Met 1079                     | O of 4-OH<br>O of 4-OH<br>O of 2-OH<br>O of 2-OH<br>O of 4-OH                                                       | 2.94<br>2.85<br>2.56<br>2.60<br>3.23             |
| 10.  | Kaempferol                | -97.722       | Leu 1002<br>Lys 1030<br><br>Lys 1030                                         | O of 4-OH<br>O of 5-OH of quinoline<br>O of 5-OH of                                                                 | 3.39<br>3.11<br>2.67                             |

|     |                   |          |                                  |                                                               |                      |
|-----|-------------------|----------|----------------------------------|---------------------------------------------------------------|----------------------|
|     |                   |          |                                  | quinoline                                                     |                      |
| 11. | Isorhamnetin      | -101.084 | Lys 1030<br>Lys 1030<br>Leu 1002 | O of 4-OH of quinoline<br>O of 5-OH of quinoline<br>O of 4-OH | 2.72<br>3.13<br>3.13 |
| 12. | Rhamnetin         | -97.8341 | Lys 1030<br>Lys 1030<br>Leu 1002 | O of 4-OH<br>O of 5-OH<br>O of 4-OH                           | 2.65<br>3.13<br>3.10 |
| 13. | Pinosylvin        | -90.5397 | Lys 1030<br>Ser 1006             | O of 3-OH<br>O of 5-OH                                        | 2.88<br>3.37         |
| 14. | Pimaric acid      | -96.3319 | No interaction                   |                                                               |                      |
| 15. | Hexacosyferrulate | -5.52251 | No interaction                   |                                                               |                      |
| 16. | Xanthone          | -70.433  | Met1079                          | 4-OH<br>pyranose                                              | 2.82                 |
| 17. | Cedeodarin        | -173.749 | No interaction                   |                                                               |                      |

Table 3 Docking scores of Chemical constituents from *Pinus roxburghii* using PDB ID: 1USO

| S.no | Compound                  | MolDock Score | Amino acid residue                                                        | Atom of the ligand                                                               | H-boond length (Å <sup>0</sup> )                     |
|------|---------------------------|---------------|---------------------------------------------------------------------------|----------------------------------------------------------------------------------|------------------------------------------------------|
| 1.   | IDD594                    | -155.639      | Tyr48<br>Tyr48<br>Tyr209<br>Ser210                                        | O of COOH<br>N of C=N<br>O of 2-OCH <sub>2</sub><br>S of SH                      | 3.09<br>2.66<br>3.41<br>3.30                         |
| 2.   | 3,4 dihydroxybenzoic acid | -95.9973      | Ser 214<br>Leu 212<br>Lys 262<br>Ile 260                                  | O of C=O<br>O of C=O<br>O of C=O<br>O of -OH                                     | 3.14<br>3.10<br>3.10<br>2.83                         |
| 3.   | Catechin                  | -134.751      | Cys 303<br>Tyr 309<br>Ala 299<br>Cys 298<br>Tyr 209<br>His 110<br>Tyr 309 | O of -OH<br>O of -OH<br>O of -OH<br>O of -OH<br>O of -OH<br>O of -OH<br>O of -OH | 3.02<br>2.51<br>3.10<br>2.60<br>3.15<br>2.79<br>3.44 |

|    |                      |              |                                                                                                                  |                                                                                                                                                                   |                                                                                              |
|----|----------------------|--------------|------------------------------------------------------------------------------------------------------------------|-------------------------------------------------------------------------------------------------------------------------------------------------------------------|----------------------------------------------------------------------------------------------|
| 4. | Secoisoresinol       | -180.947     | Trp111<br>His110<br>Asn160<br>Cys298<br>Tyr48<br>Ser210<br>Ser210<br>Asp216<br>Leu212<br>Asp43<br>Thr19<br>Trp20 | O of -4OH<br>O of -4OH<br>O of -4OH<br>O of -4OH<br>O of -4OH<br>O of -OH<br>O of -OH<br>O of -4OH<br>O of 3-OCH <sub>3</sub><br>O of -OH<br>O of -OH<br>O of -OH | 2.98<br>3.03<br>2.60<br>3.13<br>3.36<br>2.65<br>3.48<br>3.25<br>3.12<br>3.10<br>2.92<br>3.04 |
| 5. | Sandracopimaric acid | -125.402     | Tyr 48                                                                                                           | O of -OH                                                                                                                                                          | 2.60                                                                                         |
| 6. | Pinoresinol          | -146.801     | Ser 210<br>Ser 159<br>Gln 183<br>Pro 215                                                                         | O of -O-<br>O of -OH<br>O of -OH<br>O of -4-OH                                                                                                                    | 2.78<br>3.52<br>2.83<br>2.38                                                                 |
| 7. | Taxifoiln            | -140.194     | Asp 43<br>Gln 183<br>Lys 77<br>Cys 298<br>Tyr 209<br>Ser 210<br>Ile 260<br>Leu 212<br>Pro 211<br>Ser 210         | O of -OH<br>O of -OH<br>O of -OH<br>O of -OH<br>O of -OH<br>O of Pyranose<br>O of -OH<br>O of -OH<br>O of -OH<br>O of Pyranose                                    | 3.04<br>2.63<br>3.27<br>2.80<br>3.47<br>2.92<br>2.99<br>2.74<br>3.15<br>3.55                 |
| 8. | Caffeic acid         | -115.197     | Ser 214<br>Leu 212<br>Lys 262<br>Ile 260<br>Ser 210<br>Asp 43                                                    | O of C=O<br>O of C=O<br>O of C=O<br>O of -OH<br>O of -OH<br>O of -OH                                                                                              | 3.04<br>3.02<br>3.00<br>3.03<br>3.00<br>3.49                                                 |
| 9. | Quercitin            | -141.885.067 | Ile 260<br><br>Ser 210<br><br>Tyr 209<br>Cys 298<br>Lys 77<br>Gln 183<br>Asp 43<br>Pro 211<br>Leu 212            | N of<br>Quinoloine<br>N of<br>Quinoloine<br>O of -OH<br>O of -OH<br>O of -OH<br>O of -OH<br>O of -OH<br>O of -OH<br>O of -OH                                      | 2.62<br><br>3.01<br><br>3.42<br>2.82<br>3.10<br>2.70<br>2.88<br>3.26<br>2.73                 |

|     |                   |          |                                                                                               |                                                                                                                          |                                                                      |
|-----|-------------------|----------|-----------------------------------------------------------------------------------------------|--------------------------------------------------------------------------------------------------------------------------|----------------------------------------------------------------------|
| 10. | Kaempferol        | -138.548 | Ile 260<br>Asp 43<br>Lys 77<br>Ser 210<br><br>Ser 210<br><br>Cys 298<br>Tyr 209<br>Gln 183    | O of -OH<br>O of -OH<br>O of -OH<br>N of<br>Quinoline<br>N of<br>Quinoline<br>O of -OH<br>O of -OH<br>O of -OH           | 2.59<br>3.10<br>3.20<br>2.94<br><br>3.55<br><br>2.87<br>3.48<br>2.93 |
| 11. | Isorhamnetin      | -145.042 | Lys 77<br>Gln 183<br>Asp 43<br>Tyr 209<br>Cys 298<br>Ser 210<br>Ile 260<br>Leu 212            | O of -OH<br>O of -OH<br>O of -OH<br>O of -OH<br>O of -OH<br>N of<br>Quinoline<br>O of -OH<br>O of -OCH <sub>3</sub>      | 3.07<br>2.61<br>2.84<br>3.33<br>2.84<br>2.99<br>2.77<br>3.17         |
| 12. | Rhamnetin         | -150.026 | Asp 43<br>Lys 77<br>Gln 183<br>Cys 298<br>Asp 216<br>Tyr 209<br>Ser 210<br>Ser 210<br>Ile 260 | O of 3-OH<br>O of 5-OH<br>O of 5-OH<br>O of 5-OH<br>O of 3-OH<br>O of 3-OH<br>O of 8-OH<br>N of<br>Quinoline<br>O of -OH | 3.00<br>3.10<br>2.84<br>2.95<br>2.51<br>3.56<br>3.53<br>3.03<br>2.48 |
| 13. | Pinosylvin        | -134.563 | Asp 43<br>Tyr 48<br>Asp 43<br>Thr 19<br>Trp 20                                                | O of -OH<br>O of -OH<br>O of -OH<br>O of -OH<br>O of -OH                                                                 | 3.46<br>3.10<br>3.10<br>2.60<br>3.05                                 |
| 14. | Pimaric acid      | -132.033 | Tyr 48                                                                                        | O of -C=O                                                                                                                | 2.60                                                                 |
| 15. | Hexacosyferrulate | -190.717 | Tyr 309<br>Cys 303                                                                            | O of -C=O<br>O of -C=O                                                                                                   | 3.34<br>3.06                                                         |
| 16. | Xanthone          | -109.842 | Ser210<br>Trp20<br>Lys21                                                                      | O of pyranose<br>4-OH<br>pyranose<br>4-OH<br>pyranose                                                                    | 2.96<br>2.88<br>2.50                                                 |
| 17. | Cedeodarin        | -198.027 | Asp43<br>Lys262<br>Ser214<br>Leu212                                                           | N of NH<br>O of CO <sub>2</sub><br>O of CO <sub>2</sub><br>O of CO <sub>2</sub>                                          | 2.90<br>2.75<br>3.43<br>3.25                                         |

|  |  |  |        |                      |      |
|--|--|--|--------|----------------------|------|
|  |  |  | Asp216 | N of NH <sub>2</sub> | 3.54 |
|  |  |  | Ser214 | N of NH <sub>2</sub> | 3.38 |
|  |  |  | Ser210 | N of CONH            | 3.22 |

Table 4 Docking scores of Chemical constituents from *Pinus roxburghii* using PDB ID: 2f70

| S.no | Compound                  | MolDock Score | Amino acid residue | Atom of the ligand    | H-boond length (Å <sup>0</sup> ) |
|------|---------------------------|---------------|--------------------|-----------------------|----------------------------------|
| 1.   | UN608                     | -70.6666      | Arg 221            | -O of SO <sub>2</sub> | 2.85                             |
|      |                           |               | Arg 221            | -O of SO <sub>2</sub> | 2.65                             |
|      |                           |               | Ser 216            | -O of SO <sub>2</sub> | 2.65                             |
|      |                           |               | Gly 218            | -O of SO <sub>2</sub> | 3.10                             |
|      |                           |               | Ser 216            | -O of SO <sub>2</sub> | 3.08                             |
|      |                           |               | Ile 219            | -O of SO <sub>2</sub> | 2.89                             |
|      |                           |               | Gly 220            | -O of SO <sub>2</sub> | 1.94                             |
|      |                           |               | Asp 181            | -O of Ether           | 3.22                             |
|      |                           |               | Arg 221            | -O of SO <sub>2</sub> | 2.60                             |
|      |                           |               | Gly 86             | -O of SO <sub>2</sub> | 2.79                             |
| 2.   | 3,4 dihydroxybenzoic acid | -93.2968      | Ile 219            | O of C=O              | 2.94                             |
|      |                           |               | Gly 220            | O of C=O              | 2.60                             |
|      |                           |               | Gly 218            | O of C=O              | 3.27                             |
|      |                           |               | Arg 221            | O of C=O              | 3.11                             |
|      |                           |               | Arg 221            | O of C=O              | 3.10                             |
|      |                           |               | Tyr 46             | O of 3-OH             | 2.91                             |
|      |                           |               | Cys 215            | O of C=O              | 2.60                             |
| 3.   | Catechin                  | -83.535       | Arg 221            | O of 4-OH             | 3.08                             |
|      |                           |               | Gly 220            | O of 5-OH             | 2.95                             |
|      |                           |               | Tyr 46             | O of pyranose         | 3.17                             |
|      |                           |               | Arg 221            | O of 4-OH             | 3.27                             |

|    |                      |          |                                                                                                                                                                |                                                                                                                                                               |                                                                                                                                     |
|----|----------------------|----------|----------------------------------------------------------------------------------------------------------------------------------------------------------------|---------------------------------------------------------------------------------------------------------------------------------------------------------------|-------------------------------------------------------------------------------------------------------------------------------------|
| 4. | Secoisoresinol       | 19.1388  | Gln 218<br>Gly 220<br>Cys 215<br>Ile 219<br>Arg 221<br>Arg 221<br>Arg 221<br>Gly 259                                                                           | O of 3 -OH<br>O of 4 OH<br>O of CH <sub>3</sub><br>O of 4OH<br>O of OCH <sub>3</sub><br>O of OCH <sub>3</sub><br>O of OCH <sub>3</sub><br>O of 4OH            | 3.15<br>2.55<br>2.99<br>2.66<br>3.29<br>2.46<br>3.20<br>3.57                                                                        |
| 5. | Sandracopimaric acid | -87.863  | Ile 219<br>Gly 218<br>Ala 217<br>Arg 221<br>Arg 221                                                                                                            | O of C=O<br>O of C=O<br>O of C=O<br>O of C=O<br>O of C=O                                                                                                      | 3.28<br>2.84<br>3.01<br>2.76<br>3.10                                                                                                |
| 6. | Pinoresinol          | -84.4847 | Arg 221<br>Ser 216<br>Ala 217<br>Cys 215                                                                                                                       | O of 4-OH<br>O of 4-OH<br>O of OCH <sub>3</sub><br>O of OCH <sub>3</sub>                                                                                      | 2.91<br>2.95<br>3.51<br>3.40                                                                                                        |
| 7. | Taxifoiln            | -88.3651 | Arg 221<br>Asp 181<br>Arg 221<br>Ser 216<br>Cys 215<br>Gly 220<br>Arg 221<br>Asp 48<br>Ile 219                                                                 | O of 4-OH<br>O of 4-OH<br>O of 3-OH<br>O of 4-OH<br>O of 4-OH<br>O of 3-OH<br>O of 4-OH<br>O of 3-OH<br>O of 3-OH                                             | 2.99<br>3.46<br>3.48<br>3.91<br>3.26<br>2.42<br>2.60<br>3.41<br>3.29                                                                |
| 8. | Caffeic acid         | -101.897 | <b>Tyr 46</b><br><b>Gly 2220</b><br><b>Ile 219</b><br><b>Arg 221</b><br><b>Arg 221</b><br><b>Ser 216</b><br><b>Cys 215</b><br><b>Arg 221</b><br><b>Cys 215</b> | <b>3-OH</b><br><b>O of 3-OH</b><br><b>C=O</b><br><b>O of 4 -OH</b><br><b>O of 4</b><br><b>O of 4</b><br><b>O of 4</b><br><b>O of 3-OH</b><br><b>O of 3-OH</b> | <b>3.20</b><br><b>2.59</b><br><b>3.28</b><br><b>2.67</b><br><b>3.39</b><br><b>3.40</b><br><b>3.30</b><br><b>3.34</b><br><b>2.46</b> |

|            |                   |                 |                                                                                               |                                                                                                                                          |                                                                         |
|------------|-------------------|-----------------|-----------------------------------------------------------------------------------------------|------------------------------------------------------------------------------------------------------------------------------------------|-------------------------------------------------------------------------|
| 9.         | Quercetin         | 49.6707         | Tyr 46<br>Arg 221<br>Gly 262<br>Arg 221<br>Ser 216<br>Tyr 46<br>Pro 180<br>Trp 179<br>Asp 181 | O of -OH<br>O of -OH                                 | 3.17<br>3.01<br>2.93<br>3.39<br>3.51<br>3.26<br>310<br>2.96<br>2.74     |
| <b>10.</b> | <b>Kaempferol</b> | <b>-104.744</b> | <b>Try 46</b><br><b>Asp 181</b><br><b>Arg 221</b><br><b>Gly 220</b><br><b>Cys 215</b>         | <b>4-OH of Quinoline</b><br><b>5-OH of Quinoline</b><br><b>7-OH of Quinoline</b><br><b>7-OH of Quinoline</b><br><b>7-OH of Quinoline</b> | <b>3.04</b><br><b>2.95</b><br><b>3.07</b><br><b>2.80</b><br><b>2.61</b> |
| 11.        | Isorhamnetin      | -89.1876        | Arg 221<br>Ser 216<br>Gly 220<br>Asp 181<br>Asp 48                                            | 3-OH<br>3-OH<br>4-OH<br>3-OH<br>3-OH of Quinoline                                                                                        | 2.94<br>3.48<br>3.22<br>3.10<br>3.08                                    |
| 12.        | Rhamnetin         | 17.7531         | Asp181<br>Lys 120<br>Tyr 46<br>Arg 221<br>Met 258                                             | 3-OH of Quinoline<br>3-OH of OCH <sub>3</sub><br>3-OH of Quinoline<br>O of OCH <sub>3</sub><br>O of 4-OH                                 | 3.18<br>4.95<br>3.47<br>3.06<br>3.10                                    |
| 13.        | Pinosylvin        | -88.6779        | Arg 221<br>Arg 221<br>Ser 216<br>Gly 220<br>Cys 215                                           | O of OH<br>O of OH<br>O of OH<br>O of -OH<br>-OH                                                                                         | 3.16<br>2.57<br>2.60<br>2.61<br>3.09                                    |
| 14.        | Pimaric acid      | -68.8936        | No interaction                                                                                |                                                                                                                                          |                                                                         |
| 15.        | Hexacosyferrulate | 291.3442        | Ser 270                                                                                       | O of -OCH <sub>3</sub>                                                                                                                   | 2.66                                                                    |
| 16.        | Xanthone          | -83.1765        | Gln262                                                                                        | 4-OH pyranose                                                                                                                            | 3.18                                                                    |
| 17.        | Cedeodarin        | 95.3797         | Lys116                                                                                        | O of CO <sub>2</sub>                                                                                                                     | 2.78                                                                    |

|  |  |  |        |                      |      |
|--|--|--|--------|----------------------|------|
|  |  |  | Gln262 | O of CO <sub>2</sub> | 2.73 |
|  |  |  | Gly220 | N of CONH            | 3.34 |

Table 5 Docking scores of Chemical constituents from *Pinus roxburghii* using PDB ID: 3F8S

| S.no | Compound                  | MolDock Score | Amino acid residue                                                        | Atom of the ligand                                                                    | H-boond length (Å <sup>0</sup> )                     |
|------|---------------------------|---------------|---------------------------------------------------------------------------|---------------------------------------------------------------------------------------|------------------------------------------------------|
| 1.   | Pf2                       | -107.94       | Asn 710<br>Tyr 662<br>Ser 630<br>Ser 630                                  | O of -OH<br>O of Furan<br>O of Furan<br>O of Furan                                    | 3.31<br>3.50<br>3.17<br>3.40                         |
| 2.   | 3,4 dihydroxybenzoic acid | -71.4059      | Arg 125<br>Arg 125<br>Asp 709<br>Lys 122<br>Asp 793                       | O of C=O<br>O of C=O<br>O of OH<br>O of OH<br>O of OH                                 | 3.06<br>3.06<br>2.60<br>2.93<br>3.00                 |
| 3.   | Catechin                  | -112.972      | Tyr 585<br>Glu 361<br>Ile 407<br>Glu 361<br>Arg 358<br>Arg 356<br>Arg 356 | O of -OH<br>O of -OH<br>O of -OH<br>O of -OH<br>O of -OH<br>O of -OH<br>O of Pyranose | 3.17<br>3.09<br>3.18<br>3.10<br>3.48<br>3.03<br>2.85 |
| 4.   | Secoisoresinol            | -106.909      | Tyr 585<br>Arg 429<br>Arg 358<br>Ile 405                                  | OCH3<br>OCH3<br>O of OH<br>O of OH                                                    | 3.10<br>3.47<br>2.60<br>3.08                         |
| 5.   | Sandracopimaric acid      | -98.5671      | No interaction                                                            |                                                                                       |                                                      |
| 6.   | Pinoresinol               | -114.634      | Phe 357<br>Arg 358<br>Arg 358<br>Arg 358<br>Trp 215                       | 3 -OH<br>O og OCH <sub>3</sub><br>O of Furan<br>O of Furan<br>O of OH                 | 3.10<br>3.54<br>3.06<br>3.22<br>3.51                 |
| 7.   | Taxifoiln                 | -91.4079      | Asp 739<br>Glu 205<br>Asp 739<br>Lys 122                                  | O of -OH<br>O of -OH<br>O of -OH<br>O of -OH                                          | 3.10<br>2.91<br>3.10<br>2.81                         |

|     |              |          |                                                                                                            |                                                                                                                                      |                                                                      |
|-----|--------------|----------|------------------------------------------------------------------------------------------------------------|--------------------------------------------------------------------------------------------------------------------------------------|----------------------------------------------------------------------|
| 8.  | Caffeic acid | -86.569  | Asp 709<br>Asp 709<br>Arg 125                                                                              | O of -OH<br>O of -OH<br>O of -C=O                                                                                                    | 2.87<br>2.76<br>2.60                                                 |
| 9.  | Quercitin    | -88.291  | Arg 358<br>Arg 358<br>Glu 361<br>Pro 359<br>Asp 302<br>Val 303                                             | N of quinoline<br>N of quinoline<br>O of 4 OH<br>quinoline<br>O of 4 OH<br>quinoline<br>O of 3OH<br>quinoline<br>O of 3 OH           | 3.12<br>2.78<br>2.81<br>2.60<br>2.98<br>2.94                         |
| 10. | Kaempferol   | -99.4805 | Asp 739<br>Asp 739<br>Lys 122<br>Glu 205<br>Glu 205                                                        | 4 OH of<br>quinoline<br>5 OH of<br>quinoline<br>5 OH of<br>quinoline<br>7 OH of<br>quinoline<br>7 OH of<br>quinoline                 | 2.85<br>3.10<br>2.77<br>2.93<br>2.93                                 |
| 11. | Isorhamnetin | -97.2701 | Glu 408<br>Ile 407<br>Ile 407<br>Ile 407<br>Arg 356<br>Arg 356<br>Arg 382                                  | 4 OH quinoline<br>3 OH quinoline<br>3 OH quinoline<br>4 OH quinoline<br>O of -OCH <sub>3</sub><br>O of -OCH <sub>3</sub><br>O of -OH | 2.96<br>2.90<br>3.37<br>3.54<br>3.09<br>2.73<br>3.38                 |
| 12. | Rhamnetin    | -96.9684 | Arg 358<br>Arg 356<br>Arg 356<br>Arg 382<br>Ile 407<br>Ile 407<br>Ile 407<br>Ile 407<br>Ile 407<br>Glu 408 | O of -OH<br>O of -OH                 | 2.53<br>2.97<br>2.76<br>3.18<br>3.49<br>3.00<br>3.49<br>2.60<br>3.14 |
| 13. | Pinosylvin   | -97.9143 | Ser 630<br>His 740                                                                                         | O of -OH                                                                                                                             | 2.87<br>3.31                                                         |

|     |                   |          |                                                                                        |                                                                                                                                        |                                                                      |
|-----|-------------------|----------|----------------------------------------------------------------------------------------|----------------------------------------------------------------------------------------------------------------------------------------|----------------------------------------------------------------------|
|     |                   |          |                                                                                        | O of -OH                                                                                                                               |                                                                      |
| 14. | Pimaric acid      | -91.6603 | Arg 356<br>Arg 356                                                                     | O of C=O<br>O of C=O                                                                                                                   | 3.03<br>3.23                                                         |
| 15. | Hexacosyferrulate | -59.1203 | Arg 356<br>Arg 356                                                                     | O of C=O<br>O of C=O                                                                                                                   | 3.12<br>2.60                                                         |
| 16. | Xanthone          | -81.6503 | Phe713<br>Thr706<br>Ser239<br>Tyr241                                                   | O of 4-OH<br>pyranose<br>O of 4-OH<br>pyranose<br>O of pyranose<br>O of pyranose                                                       | 3.29<br>2.60<br>2.60<br>2.75                                         |
| 17. | Cedeodarin        | -100.132 | Thr736<br>Thr706<br>Tyr241<br>Ser239<br>Gln714<br>Phe713<br>Ser239<br>Thr706<br>Glu237 | O of C=O<br>O of C=O<br>N of CONH<br>O of C=O<br>O of C=O<br>O of C=O<br>O of CONH<br>N of NH <sub>2</sub><br>O of 4-OH<br>cyclohexane | 3.01<br>3.13<br>3.02<br>3.40<br>3.10<br>3.53<br>3.17<br>3.09<br>3.36 |
